# Supplementary material for: Characterization of a Unique Form of Arrhythmic Cardiomyopathy Caused by Recessive Mutation in LEMD2
Source: PubMed Central journal article supplement — JACC Basic Transl Sci. 2019 Apr 29;4(2):204–21. doi: 10.1016/j.jacbts.2018.12.001 (PMC6488817; doi:10.1016/j.jacbts.2018.12.001), 2019-04-29
Supplement: mmc1.pdf [file mmc1.pdf]

## ONLINE DATA SUPPLEMENT

### Characterization of a unique form of arrhythmic cardiomyopathy caused by recessive mutation in LEMD2

Nelly Abdelfatah<sup>a\*</sup>, PhD; Ruping Chen<sup>b\*</sup>, PhD; Henry J. Duff<sup>a</sup>, MD; Colette M. Seifer<sup>c</sup>, MB; Ilan Buffo<sup>d</sup>, MD; Cathleen Huculak<sup>e</sup>, MSc; Stephanie Clarke<sup>f</sup>, MSc; Robin Clegg<sup>g</sup>, MD; Davinder S. Jassal<sup>c</sup>, MD; Paul MK Gordon<sup>h</sup>, PhD; Carole Ober<sup>i</sup>, PhD; Care4Rare Canada Consortium; Patrick Frosk<sup>f,j</sup>, PhD, MD; Brenda Gerull<sup>a,b,k</sup>, MD.

<sup>a</sup>Department of Cardiac Sciences, Libin Cardiovascular Institute of Alberta, Cumming School of Medicine, University of Calgary, Calgary, Alberta, Canada.

<sup>b</sup>Comprehensive Heart Failure Center, University Hospital Würzburg, Würzburg, Germany.

<sup>c</sup>Section of Cardiology, Department of Internal Medicine, Max Rady College of Medicine, Rady Faculty of Health Sciences, University of Manitoba, Winnipeg, MB, Canada.

<sup>d</sup>Variety Children's Heart Centre, University of Manitoba, Winnipeg, MB, Canada.

<sup>e</sup>Department of Medical Genetics, Alberta Health Services, Calgary, AB, Canada.

<sup>f</sup>Department of Biochemistry and Medical Genetics, Max Rady College of Medicine, Rady Faculty of Health Sciences, University of Manitoba, Winnipeg, MB, Canada

<sup>g</sup>Department of Pediatrics, University of Calgary, Calgary, AB, Canada.

<sup>h</sup>Cumming School of Medicine Centre for Health Genomics and Informatics, University of Calgary, Calgary, AB, Canada.

<sup>i</sup>Department of Human Genetics, The University of Chicago, Chicago, IL, USA.

<sup>j</sup>Department of Pediatrics and Child Health, Max Rady College of Medicine, Rady Faculty of Health Sciences, University of Manitoba, Winnipeg, MB, Canada.

<sup>k</sup>Department of Internal Medicine I, University Hospital Würzburg, Würzburg, Germany.

\*contributed equally to this work

### Address for correspondence

Dr. Brenda Gerull, Comprehensive Heart Failure Center and Department of Internal Medicine I, University Hospital Würzburg, Am Schwarzenberg 15, 97078 Würzburg, Germany, Phone: ++49-931-201-46457, Fax: ++49-931-201-646457, email: gerull\_b@ukw.de

## Online Figures and Legends

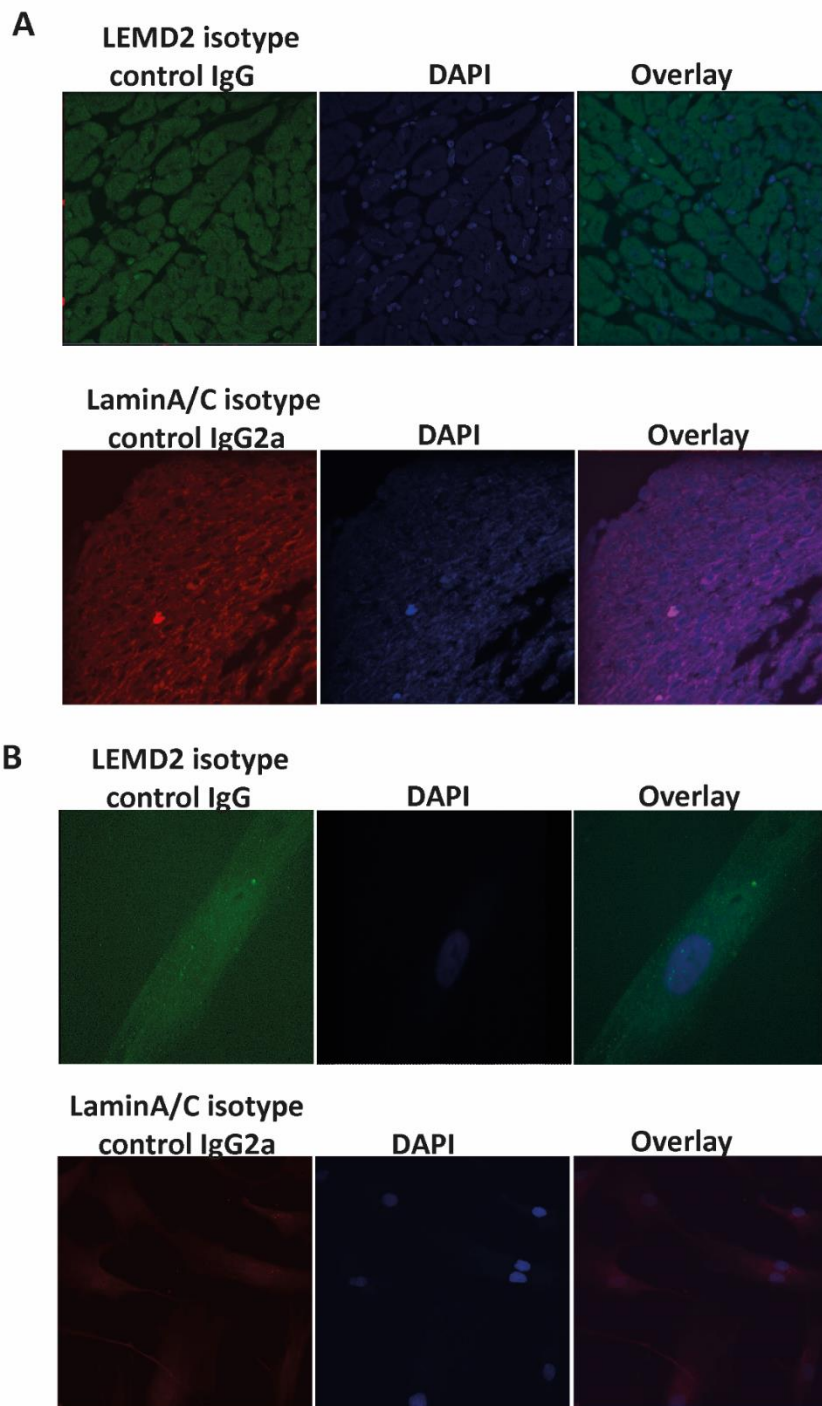

**Supplement Figure 1: Isotype controls for LEMD2 and Lamin A/C antibodies.** Heart tissue (A) and fibroblast cells (B) were stained with anti-rabbit IgG isotype control and IgG2a anti-mouse isotype control.

## Supplement Tables and Table Legends

**Supplemental Table 1: Primary and secondary antibodies**

| <b>Antibody</b>                   | <b>Company</b>              | <b>Catalogue Number</b> | <b>Application</b> | <b>Dilution</b>  |
|-----------------------------------|-----------------------------|-------------------------|--------------------|------------------|
| RB anti LEMD2                     | Novus Biologicals           | NBP1-85175              | IHC, WB            | 1:50, 1:1000     |
| MS anti Lamin A/C                 | Cell signaling              | 4777                    | IHC, WB            | 1:100,<br>1:1000 |
| RB anti-eGFP                      | Abnova                      | Ab111258                | WB                 | 1:1000           |
| RB anti-Annexin V                 | Abcam                       | Ab14196                 | WB                 | 1:1000           |
| RB anti-Cleaved<br>Caspase-3 (Asp | Cell signaling              | 9661                    | WB                 | 1:1000           |
| RB anti-Aurora B                  | Thermo Fisher<br>Scientific | PA5-14075               | WB                 | 1:1000           |
| RB anti -GAPDH                    | Abcam                       | Ab181602                | WB                 | 1:3000           |
| RB IgG-Alexa 488                  | Invitrogen                  | A11034                  | IHC                | 1:100            |
| MS IgG- Alexa 555                 | Invitrogen                  | A21422                  | IHC                | 1:100            |
| RB IgG HRP                        | GE Healthcare               | NA934V                  | WB                 | 1:3000           |
| MS IgG HRP                        | GE Healthcare               | NXA931                  | WB                 | 1:5000           |

## Supplemental Table 2: Haplotypes of affected family members

| Gene          | Variant       | hg 38 Position | rs#                         | Global MAF | Family 600 |   |       |   |      |   |      |   | Family 290 |        |   |
|---------------|---------------|----------------|-----------------------------|------------|------------|---|-------|---|------|---|------|---|------------|--------|---|
|               |               |                |                             |            | II-18      |   | III-4 |   | II-2 |   | II-3 |   | III-12     | III-13 |   |
| GMNN          | c.357+39C>T   | chr6:24774931  | <a href="#">rs2307308</a>   | 0.0112/56  | T          | T | T     | T | T    | T | T    | T | T          | T      | C |
| HIST1H4E      | c.*28T>A      | chr6:26204552  | <a href="#">rs41266809</a>  | 0.0026/13  | A          | A | A     | A | A    | A | A    | A | A          | A      | T |
| HIST1H2B<br>N | c.*10C>T      | chr6:27838662  | <a href="#">rs112586220</a> | 0.0028/14  | T          | T | T     | T | T    | T | T    | T | T          | T      | C |
| ITPR3         | g.33650433G>A | chr6:33620365  | <a href="#">rs78238190</a>  | 0.0064/32  | A          | A | A     | A | A    | A | A    | A | A          | A      | A |
| LEMD2         | c.38T>G       | chr6:33771202  | -                           | -          | G          | G | G     | G | G    | G | G    | G | G          | G      | G |
| RNF8          | c.*1189G>A    | chr6:37353972  | <a href="#">rs34150698</a>  | 0.0292/146 | A          | A | A     | A | A    | A | A    | A | -          | -      | - |
| CUL7          | c.4762C>A     | chr6:43037617  | <a href="#">rs147493246</a> | 0.0057/28  | A          | A | A     | A | -    | - | -    | - | C          | C      | A |
| PTK7          | c.19G>A       | chr6:43076268  | <a href="#">rs139636574</a> | 0.0056/28  | A          | A | A     | A | -    | - | -    | - | G          | G      | A |

## Supplemental Table 2: Haplotypes of six affected family members across an 18.3Mb region at chr6p between chr6:24,774,931-chr6:43,076,268.

Shared haplotypes are denoted by the red letters. The region of homozygosity is narrowed down to a 6.8 Mb by an affected member of family 290 III-13. c.38T>G variant in LEMD2 gene was the only variant segregates with the phenotype in the two families. rs# referred to the SNP number. MAF referred to minor allele frequency and the global MAF for the variants were taken from SNP database Available from: <http://www.ncbi.nlm.nih.gov/SNP>
